# Supplementary material
Source: PubMed Central journal article supplement (PMC1367094)
Supplement: biophysj_105.069781_1.pdf [file biophysj_105.069781_1.pdf]

## Supplemental Materials

# Electrostatic influence of PsaC protein binding to the PsaA/PsaB heterodimer in Photosystem I

Hiroshi Ishikita, Dietmar Stehlik, John H. Golbeck and Ernst-Walter Knapp

## Supplemental Discussion

**Difference between the Henderson-Hasselbalch and the effective  $pK_a$ .** The difference between the Henderson-Hasselbalch  $pK_a$  and the effective  $pK_a$  is pronounced especially for strong electrostatic coupling between different titratable residues. The latter  $pK_a$  relates directly to measurable protonation probability of the considered residue. For instance, we obtained a protonation probability of 0.27  $H^+$  for Asp-B575 in the  $A_{1B}^-$  state of the P700- $F_X$  core at pH 7 (see main text). This protonation probability yields the effective  $pK_a$  value of 6.6 for this residue according to the following equation (1)

$$pK_a = pH + \frac{1}{\ln 10} \ln \frac{\langle x \rangle}{1 - \langle x \rangle} \quad (\text{eq. S1})$$

where  $\langle x \rangle$  is the protonation probability of the considered titratable residue. In cases where  $pK_a$  and solvent pH differ too much, the protonation probability  $\langle x \rangle$  is close to zero or one. Under such circumstances the evaluated  $pK_a$  is error prone, since the numerical accuracies of the computed probabilities  $\langle x \rangle$  are too low. In this case, the Henderson-Hasselbalch  $pK_a$  definition becomes more useful. Although, it is an invasive method, since it changes the protonation state of the considered residue by using a bias potential.

For the same charge state  $A_{1B}^-$ , the Henderson-Hasselbalch  $pK_a$  of Asp-B575 in the P700- $F_X$  core evaluated with application of a bias potential is 6.9 (Table 1 in the main text), which differs by 0.3  $pK_a$  units (corresponding to an energy of 18 meV) from that obtained with eq. S1. Asp-B575 is located in the inner water network between  $A_{1A/B}$  and  $F_X$  (2). When we constrain the protonation state of Asp-B575 to be 0.5  $H^+$  as is done with a bias potential (i.e. using the definition of the Henderson-Hasselbalch  $pK_a$ ), we simultaneously obtain tiny changes of the protonation pattern of nearby titratable residues, namely deprotonation at Asp-B555, Asp-B558, Glu-B682 and Glu-F98 (see Fig. 1A in the main text). These local deprotonations induced by constraining Asp-B575 to be half protonated are the main source that yields different values for the Henderson-Hasselbalch and the effective  $pK_a$ .

## Supplemental References

1. Ullmann, G.M., and E.W. Knapp. 1999. Electrostatic models for computing protonation and redox equilibria in proteins. *Eur. Biophys. J.* 28:533-551.
2. Jordan, P., P. Fromme, H.T. Witt, O. Klukas, W. Saenger, and N. Krauß. 2001. Three-dimensional structure of cyanobacterial photosystem I at 2.5 Å resolution. *Nature* 411:909-917.

## Supplemental Table

**Table S1:** Calculated  $pK_a$  values of residues for the native PSI complex and the P700-F<sub>X</sub> core in the P<sub>B</sub><sup>0</sup> state.

| residues of<br>PsaA     | redox<br>state <sup>a</sup>  | native<br>PSI | P700-F <sub>X</sub><br>core | residues of<br>PsaB | redox<br>state <sup>a</sup>  | native<br>PSI | P700-F <sub>X</sub><br>core |
|-------------------------|------------------------------|---------------|-----------------------------|---------------------|------------------------------|---------------|-----------------------------|
| Asp-A568                |                              | 3.9           | 4.7                         | Asp-B555            |                              | 4.1           | 5.6                         |
| (Asn-A571) <sup>b</sup> |                              |               |                             | Asp-B558            |                              | 8.5           | 5.7                         |
| Asp-A579                |                              | -0.2          | 2.0                         | Asp-B566            |                              | -4.8          | 3.2                         |
| Arg-A583                |                              | 22.3          | 13.6                        | Arg-B570            |                              | 21.4          | 15.5                        |
| (Gln-A588) <sup>b</sup> |                              |               |                             | Asp-B575            |                              | 5.4           | 5.1                         |
|                         |                              |               |                             |                     | A <sub>1A</sub> <sup>-</sup> | 8.9           | 8.3                         |
|                         |                              |               |                             |                     | A <sub>1B</sub> <sup>-</sup> | 7.4           | 7.0                         |
|                         |                              |               |                             |                     | F <sub>X</sub> <sup>-</sup>  | 9.4           | 8.6                         |
| Glu-A699                |                              | -2.6          | -2.4                        | Glu-B679            |                              | -4.2          | -4.3                        |
|                         | A <sub>1A</sub> <sup>-</sup> | -2.7          | -2.5                        |                     | A <sub>1B</sub> <sup>-</sup> | -3.9          | -3.9                        |
| Glu-A702                |                              | -1.3          | 2.6                         | Glu-B682            |                              | 4.8           | 5.2                         |
|                         | A <sub>1A</sub> <sup>-</sup> | -1.3          | 2.8                         |                     | A <sub>1B</sub> <sup>-</sup> | 6.3           | 5.9                         |
| (Gln-A718) <sup>b</sup> |                              |               |                             | Lys-B702            |                              | 16.4          | 10.0                        |

<sup>a</sup> If no redox state is indicated all redox active cofactors are in the neutral charge state.

<sup>b</sup> Non-titratable residue in PsaA, which is symmetry related to a titratable residue in PsaB.
